# Supplementary material for: Ammonium ionic liquids with anions of natural origin
Source: Royal Society of Chemistry journal article supplement (doi:10.1039/c5ra11710k), 2015-01-01
Supplement: c5ra11710k1.pdf [file c5ra11710k1.pdf]

## ELECTRONIC SUPPORTING INFORMATION

– RSC Advances

### Ammonium Ionic Liquids with anion of natural origin

Juliusz Pernak<sup>a</sup>, Bartosz Łęgosz<sup>a</sup>, Filip Walkiewicz<sup>a</sup>, Tomasz Klejdysz<sup>b</sup>, Andrzej Borkowski<sup>c</sup>,  
Łukasz Chrzanowski<sup>a</sup>

<sup>a</sup> Department of Chemical Technology, Poznan University of Technology,  
Poznan 60-965, Poland

<sup>b</sup> Institute of Plant Protection, National Research Institute, Poznan 60-318, Poland

<sup>c</sup> Faculty of Geology, University of Warsaw, Warsaw 02-089, Poland

#### 1. TG and DSC curves

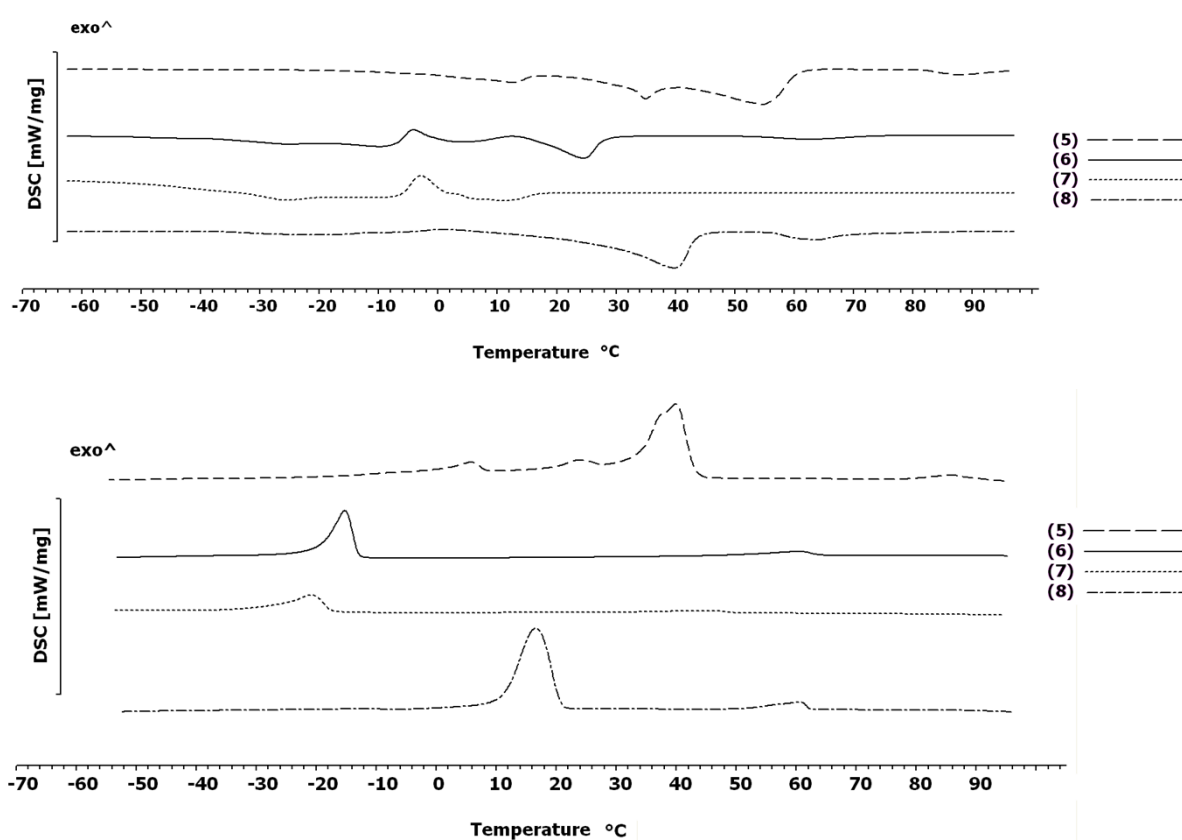

**Figure 1** Differential scanning calorimetry melting curves of benzalkonium salts (5 – 8): top – heating, bottom – cooling

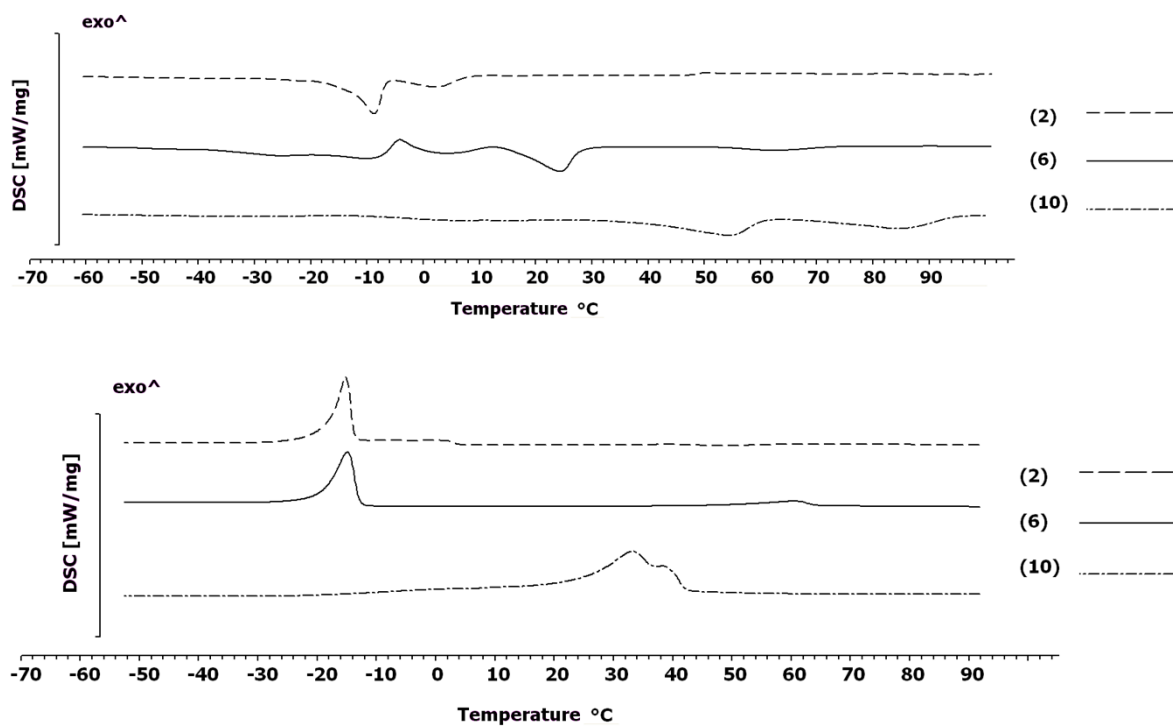

**Figure 2** Differential scanning calorimetry of didecyldimethylammonium (2), benzalkonium (6) and hexadecyltrimethylammonium (10) oleates: top – heating, bottom – cooling

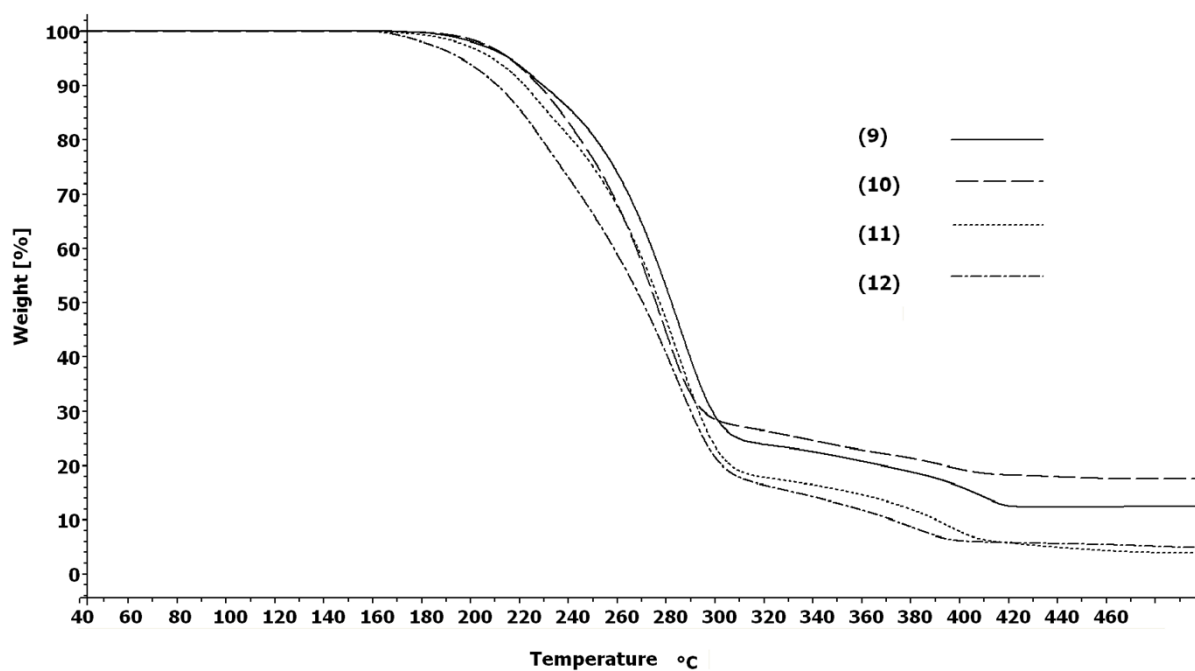

**Figure 3** Thermal stability of hexadecyltrimethylammonium salts (9 – 12)

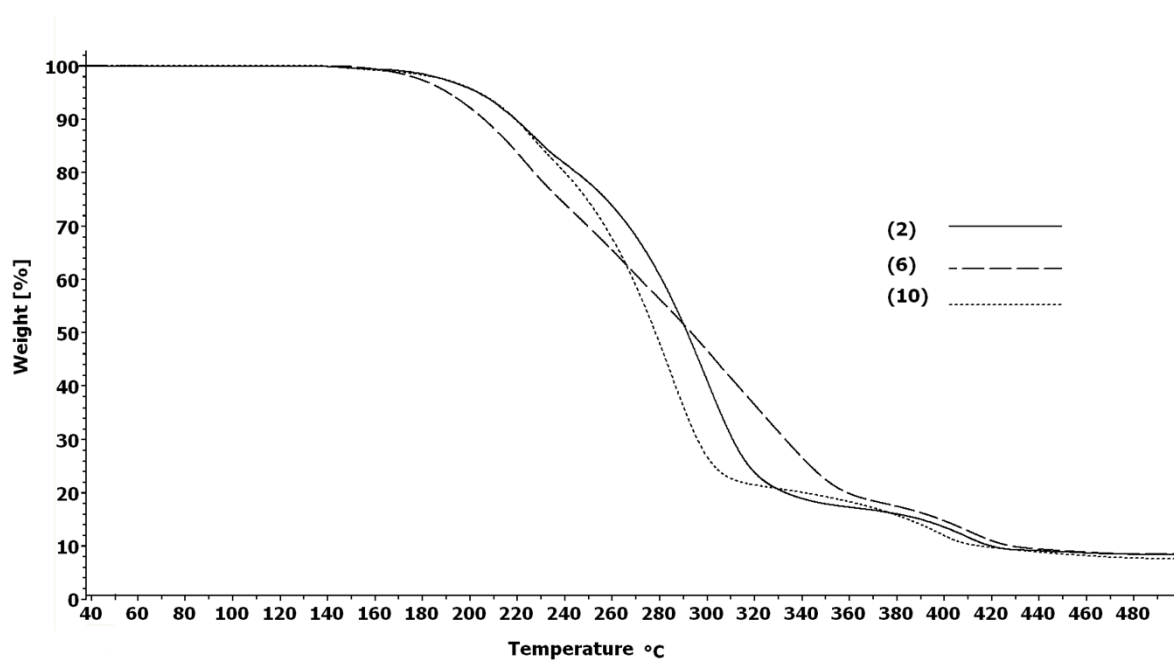

**Figure 4** Thermal stability of didecyldimethylammonium (3), benzalkonium (7) and hexadecyltrimethylammonium (11) canolates
